# Supplementary material for: Flat versus Simulated Mountain Trail Running: A Multidisciplinary Comparison in Well-Trained Runners
Source: MDPI journal article supplement (doi:10.3390/ijerph20065189), 2023-03-15
Supplement: s1 [file s1]

**Table S1.** – Descriptive table with the results for each muscle and condition. Data are expressed as mean  $\pm$  SD. FC, flat condition; URV, unpredictable roll variations; BF, bicep femoris; CoV, coefficient of variation; GM, gastrocnemius medialis; PL, peroneus longus; SOL, soleus; TA, tibialis anterior; VL, vastus lateralis; VM, vastus medialis. \* =  $p < .05$  FC vs URV; \*\* =  $p < .01$  FC vs URV; \*\*\* =  $p < .001$  FC vs URV; # =  $p < .05$  8 km·h<sup>-1</sup> vs. 12 km·h<sup>-1</sup>; ## =  $p < .01$  8 km·h<sup>-1</sup> vs. 12 km·h<sup>-1</sup>; ### =  $p < .001$  8 km·h<sup>-1</sup> vs. 12 km·h<sup>-1</sup>; \$ =  $p < .05$  8 km·h<sup>-1</sup> vs. 10 km·h<sup>-1</sup>; \$\$ =  $p < .01$  8 km·h<sup>-1</sup> vs. 10 km·h<sup>-1</sup>; \$\$\$ =  $p < .001$  8 km·h<sup>-1</sup> vs. 10 km·h<sup>-1</sup>; £ =  $p < .05$  10 km·h<sup>-1</sup> vs. 12 km·h<sup>-1</sup>; ££ =  $p < .01$  10 km·h<sup>-1</sup> vs. 12 km·h<sup>-1</sup>; £££ =  $p < .001$  10 km·h<sup>-1</sup> vs. 12 km·h<sup>-1</sup>

|     |                 |     | 8 km·h <sup>-1</sup>                  | 10 km·h <sup>-1</sup>                                 | 12 km·h <sup>-1</sup>                  |
|-----|-----------------|-----|---------------------------------------|-------------------------------------------------------|----------------------------------------|
| BF  | Mean peaks (mV) | FC  | 0.225 $\pm$ 0.064                     | 0.261 $\pm$ 0.086                                     | 0.283 $\pm$ 0.092                      |
|     |                 | URV | 0.297 $\pm$ 0.234                     | 0.285 $\pm$ 0.206                                     | 0.260 $\pm$ 0.069                      |
|     |                 |     | p <sub>bonf</sub> = 1, d = -0.503     | p <sub>bonf</sub> = 1, d = -0.168                     | p <sub>bonf</sub> = 1, d = 0.162       |
|     | Mean width (ms) | FC  | 102 $\pm$ 14                          | 100 $\pm$ 13                                          | 102 $\pm$ 11                           |
|     |                 | URV | 104 $\pm$ 15                          | 101 $\pm$ 13 <sup>\$\$</sup>                          | 104 $\pm$ 12 <sup>£££</sup>            |
|     |                 |     | p <sub>bonf</sub> = 1, d = -0.141     | p <sub>bonf</sub> = <.001 <sup>***</sup> , d = -1.279 | p <sub>bonf</sub> = 1, d = -0.175      |
| GM  | Mean peaks (mV) | FC  | 0.392 $\pm$ 0.065                     | 0.406 $\pm$ 0.094                                     | 0.410 $\pm$ 0.088                      |
|     |                 | URV | 0.411 $\pm$ 0.154                     | 0.420 $\pm$ 0.129                                     | 0.543 $\pm$ 0.260 <sup>##</sup>        |
|     |                 |     | p <sub>bonf</sub> = 1, d = -0.038     | p <sub>bonf</sub> = 1, d = -0.194                     | p <sub>bonf</sub> = 0.042*, d = -0.906 |
|     | Mean width (ms) | FC  | 123 $\pm$ 10                          | 127 $\pm$ 13                                          | 127 $\pm$ 16                           |
|     |                 | URV | 128 $\pm$ 11                          | 125 $\pm$ 15                                          | 118 $\pm$ 17 <sup>#</sup>              |
|     |                 |     | p <sub>bonf</sub> = 1, d = -0.344     | p <sub>bonf</sub> = 1, d = 0.124                      | p <sub>bonf</sub> = 0.102, d = 0.653   |
| PL  | Mean peaks (mV) | FC  | 0.217 $\pm$ 0.078                     | 0.230 $\pm$ 0.084                                     | 0.246 $\pm$ 0.079 <sup>###</sup>       |
|     |                 | URV | 0.210 $\pm$ 0.062                     | 0.200 $\pm$ 0.059                                     | 0.229 $\pm$ 0.072 <sup>###,£</sup>     |
|     |                 |     | p <sub>bonf</sub> = 1, d = 0.244      | p <sub>bonf</sub> = 1, d = 0.278                      | p <sub>bonf</sub> = 1, d = 0.235       |
|     | Mean width (ms) | FC  | 115 $\pm$ 14                          | 113 $\pm$ 15                                          | 110 $\pm$ 15                           |
|     |                 | URV | 119 $\pm$ 12                          | 119 $\pm$ 13                                          | 117 $\pm$ 15                           |
|     |                 |     | p <sub>bonf</sub> = 1, d = -0.313     | p <sub>bonf</sub> = 0.278, d = -0.425                 | p <sub>bonf</sub> = 0.203, d = -0.448  |
| SOL | Mean peaks (mV) | FC  | 0.228 $\pm$ 0.085                     | 0.242 $\pm$ 0.089                                     | 0.268 $\pm$ 0.108 <sup>##</sup>        |
|     |                 | URV | 0.270 $\pm$ 0.146                     | 0.268 $\pm$ 0.133                                     | 0.290 $\pm$ 0.144                      |
|     |                 |     | p <sub>bonf</sub> = 1, d = -0.356     | p <sub>bonf</sub> = 1, d = -0.216                     | p <sub>bonf</sub> = 1, d = -0.180      |
|     | Mean width (ms) | FC  | 120 $\pm$ 9                           | 119 $\pm$ 12                                          | 116 $\pm$ 12                           |
|     |                 | URV | 118 $\pm$ 11                          | 116 $\pm$ 11                                          | 116 $\pm$ 11                           |
|     |                 |     | p <sub>bonf</sub> = 1, d = 0.194      | p <sub>bonf</sub> = 1, d = 0.217                      | p <sub>bonf</sub> = 1, d = -0.002      |
| ST  | Mean peaks (mV) | FC  | 0.221 $\pm$ 0.078                     | 0.235 $\pm$ 0.051                                     | 0.298 $\pm$ 0.088                      |
|     |                 | URV | 0.305 $\pm$ 0.269                     | 0.312 $\pm$ 0.206                                     | 0.291 $\pm$ 0.125                      |
|     |                 |     | p <sub>bonf</sub> = 0.980, d = -0.537 | p <sub>bonf</sub> = 1, d = -0.494                     | p <sub>bonf</sub> = 1, d = 0.048       |
|     | Mean width (ms) | FC  | 103 $\pm$ 11                          | 103 $\pm$ 12                                          | 104 $\pm$ 12                           |
|     |                 | URV | 107 $\pm$ 12                          | 104 $\pm$ 14                                          | 104 $\pm$ 14                           |
|     |                 |     | p <sub>bonf</sub> = 0.467, d = -0.302 | p <sub>bonf</sub> = 1, d = -0.135                     | p <sub>bonf</sub> = 1, d = -0.003      |
| TA  | Mean peaks (mV) | FC  | 0.166 $\pm$ 0.083                     | 0.176 $\pm$ 0.091                                     | 0.179 $\pm$ 0.057                      |
|     |                 | URV | 0.159 $\pm$ 0.075                     | 0.175 $\pm$ 0.081                                     | 0.176 $\pm$ 0.054                      |
|     |                 |     | p <sub>bonf</sub> = 1, d = 0.089      | p <sub>bonf</sub> = 1, d = 0.008                      | p <sub>bonf</sub> = 1, d = 0.047       |

|  |                    |     |                                       |                                       |                                       |
|--|--------------------|-----|---------------------------------------|---------------------------------------|---------------------------------------|
|  | Mean width (ms)    | FC  | 102±17                                | 96±15                                 | 99±16                                 |
|  |                    | URV | 105±14                                | 104±18                                | 103±16                                |
|  |                    |     | $p_{\text{bonf}} = 1, d = -0.216$     | $p_{\text{bonf}} = 0.419, d = -0.466$ | $p_{\text{bonf}} = 1, d = -0.251$     |
|  | VL Mean peaks (mV) | FC  | 0.205±0.044                           | 0.232±0.050                           | 0.249±0.041 <sup>##</sup>             |
|  |                    | URV | 0.242±0.088                           | 0.240±0.063                           | 0.253±0.068                           |
|  |                    |     | $p_{\text{bonf}} = 0.224, d = -0.618$ | $p_{\text{bonf}} = 1, d = -0.129$     | $p_{\text{bonf}} = 1, d = -0.065$     |
|  | Mean width (ms)    | FC  | 107±9                                 | 100±9 <sup>\$\$\$</sup>               | 96±10 <sup>###</sup>                  |
|  |                    | URV | 105±9                                 | 100±9 <sup>\$</sup>                   | 100±9 <sup>##</sup>                   |
|  |                    |     | $p_{\text{bonf}} = 1, d = 0.195$      | $p_{\text{bonf}} = 1, d = -0.034$     | $p_{\text{bonf}} = 0.417, d = -0.353$ |
|  | VM Mean peaks (mV) | FC  | 0.254±0.149                           | 0.220±0.070                           | 0.209±0.066                           |
|  |                    | URV | 0.206±0.067                           | 0.218±0.071                           | 0.211±0.084                           |
|  |                    |     | $p_{\text{bonf}} = 0.874, d = 0.539$  | $p_{\text{bonf}} = 1, d = -0.096$     | $p_{\text{bonf}} = 1, d = 0.102$      |
|  | Mean width (ms)    | FC  | 107±7                                 | 102±6 <sup>\$\$</sup>                 | 99±8 <sup>###</sup>                   |
|  |                    | URV | 110±10                                | 104±10                                | 102±10                                |
|  |                    |     | $p_{\text{bonf}} = 1, d = 0.919$      | $p_{\text{bonf}} = 1, d = -0.219$     | $p_{\text{bonf}} = 1, d = -0.289$     |
